# Supplementary material
Source: Elsevier journal article supplement (https://www.sciencedirect.com/science/article/pii/S0300893216301816)
Supplement: mmc1 [file S0300893216301816:mmc1.pdf]

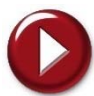

## Material suplementario

---

### **Factor de transcripción TBX1 en el remodelado cardiaco asociado al infarto de miocardio**

Jesus Sánchez-Más <sup>a,b,\*</sup>, Antonio Lax <sup>a,b</sup>, Carmen Asensio-López Mari <sup>a,b</sup>, María Josefa Fernández del Palacio <sup>c</sup>, Luis Caballero <sup>a</sup>, Marina Navarro Peñalver <sup>a</sup>, María Teresa Pérez Martínez <sup>a,b</sup>, Juan Ramón Gimeno-Blanes<sup>a</sup> y Domingo Andrés Pascual Figal<sup>a,b</sup>

*<sup>a</sup>Servicio de Cardiología, Grupo de Investigación Clínica y Traslacional Cardiovascular, Hospital Clínico Universitario Virgen de la Arrixaca, Instituto Murciano de Investigación Biosanitaria (IMIB)-Arrixaca, El Palmar, Murcia, España*

*<sup>b</sup>Departamento de Medicina Interna, Facultad de Medicina, Universidad de Murcia, Murcia, España*

*<sup>c</sup>Departamento de Patología Animal, Hospital Clínico Veterinario, Universidad de Murcia, Murcia, España*

---

## MATERIAL SUPLEMENTARIO

### MÉTODOS

#### Reactivos

Los reactivos eplerenona, ácido bicinconínico, sulfato de cobre y demás reactivos, a menos que se especifique lo contrario, se obtuvieron de Sigma-Aldrich Corp. (St. Louis, MO, Estados Unidos). El anticuerpo de la proteína T-box 1 (anti-TBX1) (ab109313) fue suministrado por Abcam (Cambridge, MA, Estados Unidos). El anticuerpo contra la quinasa regulada por señales extracelulares (anti-Erk) (sc-154) fue suministrado por Santa Cruz Biotechnology (Santa Cruz, CA, Estados Unidos). El anticuerpo secundario contra inmunoglobulina G (anti-IgG) de conejo conjugado con peroxidada (W4011) fue suministrado por Promega (Madison, WI, Estados Unidos). La medetomidina, ketamina, buprenorfina, neomicina, y povidona yodada fue suministrada por el servicio de animalario de la Universidad de Murcia. Los reactivos de detección ECL y los marcadores de peso molecular se obtuvieron de Amersham Pharmacia Biotech (Piscataway, NJ, Estados Unidos).

#### Modelo animal de infarto agudo de miocardio

Se usaron ratas Wistar macho con peso promedio de  $230 \pm 20$  g, adquiridas del servicio de animalario (código REGA ES300305440012) de la Universidad de Murcia, España. Los protocolos experimentales fueron aprobados por el Comité. Los animales se alojaron en condiciones estándar de laboratorio, en una instalación libre de patógenos bajo estricto control veterinario y mantenidos en habitaciones controladas con ciclos de 12 h de luz/oscuridad. Los animales recibieron, a lo largo de todo el procedimiento experimental, una dieta tipo comercial y agua *ad libitum*.

El infarto agudo de miocardio se indujo mediante ligación permanente de la arteria coronaria descendente anterior izquierda. En condiciones asépticas, las ratas se anestesiaron con ketamina 75 mg/kg y medetomidina 0,5 mg/kg intraperitoneal y posteriormente fueron intubadas con una cánula del calibre 16 F y conectados a ventilación mecánica. Los animales se colocaron en posición supina sobre la tabla operatoria atemperada a 37°C y monitorizados mediante electrocardiograma. La toracotomía

se realizó entre el cuarto y quinto espacio intercostal izquierdo. La colocación de retractores nos permitió separar las costillas. A continuación, se abrió el pericardio cuidadosamente, se identificó la arteria coronaria descendente anterior izquierda en la cara anterior del corazón aproximadamente 2 mm debajo de la intersección de la arteria pulmonar con la orejuela izquierda, se rodeó con sutura de prolene 6-0 y se ligó. Es posible evaluar el resultado de forma inmediata, debido a que el corazón se torna pálido en la pared anterior y lateral y se produce una elevación del segmento ST en el electrocardiograma. Finalmente se realizó el cierre de la pared torácica por planos y se agregó neomicina en polvo y povidona yodada en la región de la sutura. Tras la cirugía, lo animales recibieron cuatro dosis de buprenorfina (0,05 mg/Kg, subcutánea) cada ocho horas.

### **Ecocardiografía**

En todos los animales se realizó un estudio ecocardiográfico completo bidimensional (2D), modo M, Doppler tisular y "*strain/strain rate*" basados en 2D, 24 h antes de la cirugía y el día anterior al sacrificio (transductor sectorial 4-12 MHz, HD7 XE, Philips, Andover, Massachusetts, Estados Unidos). Se realizó de acuerdo con las recomendaciones del Comité Ecocardiográfico de la Especialidad de Cardiología del Colegio Americano de Medicina Interna en Veterinaria<sup>1</sup>. Se calculó la media de tres medidas para cada parámetro ecocardiográfico. Los animales se anestesiaron según el procedimiento experimental descrito anteriormente. Las variables de función cardiaca analizadas fueron: el índice de motilidad regional (IMR), la fracción de eyección del ventrículo izquierdo, las dimensiones y volúmenes telesistólicos y telediastólicos a nivel de ventrículo izquierdo y el cambio fraccional del área. El IMR se calculó en base a un sistema de 16 segmentos obtenidos a partir de tres imágenes en eje corto obtenidas a nivel de la válvula mitral, músculos papilares y ápex. La motilidad de la pared se puntuó como 1= normoquinesia, 2= hipoquinesia, 3= aquinesia, 4= disquinesia para cada segmento y el IMR se calculó como la suma de la puntuación dividido por el número total de segmentos.

### **Extracción de ácido ribonucleico y la reacción en cadena de la polimerasa a tiempo real cuantitativa**

Para el aislamiento del ácido ribonucleico (ARN), empleamos el kit Dynabeads mRNA Direct (Amersham Pharmacia Biotech, Piscataway, NJ, Estados Unidos). Para ello, el tejido cardíaco (30 mg) procedente del área infartada o no infartada se lavó en tampón fosfato salino (PBS) frío, se homogeneizó en 1 ml de tampón de lisis siguiendo las instrucciones del fabricante mediante el uso de un homogeneizador Tissue Tearor (Bio Spec Products Inc, Bartlesville, OK, Estados Unidos). El ARN mensajero (ARNm) aislado se sometió a retrotranscripción para la obtención de ácido desoxirribonucleico complementario (ADNc) usando el kit GeneAmp RNA PCR (Roche, Branchburg, NJ, Estados Unidos). La reacción en cadena de la polimerasa a tiempo real (RT-PCR) se realizó con el kit SYBR Premix Ex Taq (Takara Biothechnology, Dalian, China). Los cebadores se suministraron por Sigma-Aldrich y las secuencias se detallan en la Tabla S1. La eficiencia de cada par de cebadores se evaluó mediante ensayos con diluciones seriadas de ADNc. Así, 0,5-3  $\mu$ l de ADNc se amplificaron mediante 50 ciclos de RT-PCR (10 s a 95°C, 10 s a 60°C y 15 s a 72°C) en un sistema LightCycler 1,5 (Roche). Los datos se normalizaron respecto a expresión de ARNm de gliceraldehído-3-fosfato deshidrogenasa y se expresan referidos al grupo control.

### **Aislamiento de fracción proteica y transferencia Western**

Para la extracción de proteína, el tejido cardíaco (40 mg), procedente del área infartada o no infartada, se lavó en PBS frío y se homogeneizó mediante el uso de un homogeneizador Tissue Tearor (Bio Spec Products) en 500  $\mu$ l del siguiente tampón de solubilización: 20 mM Tris-HCl, 150 mM NaCl, 50 mM NaF, 2 mM ácido etildiamino-tetraacético (EDTA), 2 mM ácido etilenglicol-tetraacético (EGTA), 10% (v/v) glicerol, 1% (v/v) Igepal CA-630, 0,1% (p/v) dodecilsulfato sódico (SDS), 1% (p/v) desoxicolato de sodio, 5 mM  $\text{Na}_3\text{VO}_4$ , 1% (p/v) fluoruro de fenilmetilsulfonilo (PMSF), inhibidores de fosfatasas (524625, Calbiochem, La Jolla, CA, Estados Unidos), inhibidores de proteasas (P8340, Sigma-Aldrich) y pH 8). El homogenado se centrifugó a 20.000 xg durante 20 min a 4°C y el sobrenadante se almacenó a -80°C. La concentración de proteína se calculó mediante el método del ácido bicinonínico.

La expresión proteica de TBX1 se evaluó mediante análisis por transferencia Western. Para ello, 40 µg de cada extracto proteico se calentaron a 95°C, separados mediante electroforesis en gel de poliacrilamida con dodecilsulfato sódico (SDS-PAGE) en geles al 10% y transferidos a membranas de fluoruro de polivinilideno (PVDF) (Immobilon-PSQ Membranes, Millipore, Bedford, MA, Estados Unidos). Se separó el tercio superior de cada membrana para realizar la tinción inespecífica con solución *amido black* (*amido black* 0,1%, metanol 45%, ácido acético 10%) que se empleó posteriormente como control de carga. El resto de la membrana se bloqueó con leche desnatada al 5% en PBS y se incubó durante toda la noche a 4°C en tampón de unión (PBS, Tween 20 0,1%, leche desnatada 1%) con el anticuerpo primario contra TBX1 (dilución 1:1.000). Al día siguiente, las membranas se lavaron en tampón de lavado (PBS, Tween 20 0,1%) y se incubaron durante 60 min a temperatura ambiente con el anticuerpo secundario marcado con peroxidasa (1:5.000). Tras repetir los lavados, la unión del anticuerpo se detectó por quimioluminiscencia con ECL (GE Healthcare Biosciences, Holanda) en un sistema ChemiDoc™ XRS+ (BioRad Laboratories Inc., Berkeley, CA, Estados Unidos). Se realizaron un mínimo de 4 experimentos independientes para cada una de las proteínas analizadas. Los resultados de expresión de TBX1 se normalizaron respecto a proteína total de carga usando métodos diferentes para los extractos procedentes del área infartada o del área no infartada. En el análisis del área no infartada se empleó como control de carga el valor de expresión total (fosforilada y no fosforilada) de quinasas reguladas por señalización extracelular (Erk). En el área infartada se empleó como control de carga una banda inespecífica resultante de la tinción con solución *amido black* previa al bloqueo de la membrana. La elección de este método se debió a que los controles habituales para el análisis de transferencia Western sufren variación en su expresión en las semanas posteriores al infarto como consecuencia del remodelado cardiaco. Los resultados se expresan referidos al grupo control. El análisis cuantitativo se realizó con el programa Gel Pro Analyzer 3,1 (Sigma-Aldrich).

## **BIBLIOGRAFÍA**

1. Thomas WP, Gaber CE, Jacobs GJ, Kaplan PM, Lombard CW, Moise NS, et al. Recommendations for standards in transthoracic two-dimensional echocardiography in the dog and cat. Echocardiography Committee of the Specialty of Cardiology, American College of Veterinary Internal Medicine. J Vet Intern Med Am Coll Vet Intern Med. 1993;7:247–52.

**Tabla S1**

Cebadores empleados en el análisis RT-PCR.

| ARNm (rata)  | Cebador directo (5' → 3') | Cebador reverso (5' → 3') |
|--------------|---------------------------|---------------------------|
|              |                           |                           |
| GAPDH        | CTGCACCACCAACTGCTTA       | AGAGGGGGCCATCCACAGTC      |
| TBX1         | TAACCTGCTGGACGACAA        | GAAGTTCTCCTCTGCGTATT      |
| ANP          | ATGGGCTCCTTCTCCATCAC      | TCTACCGGCATCTTCTCCTC      |
| BNP          | GGGCTGTGACGGGCTGAGGTT     | AGTTTGTGCTGGAAGATAAGA     |
| β-MHC        | AAGTCCTCCCTCAAGCTCCTAAGT  | TTGCTTTGCCTTTGCCC         |
| α-actina 1   | TCAGGCGGTGCTGTCTCTCT      | TCCCCAGAATCCAACACGAT      |
| Colágeno I   | CATGTTTCAGCTTTGTGGACCT    | GCAGCTGACTTCAGGGATGT      |
| Colágeno III | TCCCCTGGAATCTGTGAATC      | TGAGTCGAATTGGGGAGAAT      |
| TGFb         | CACCCGCGTGCTAATGGT        | GGCACTGCTTCCCGAATG        |
| Galectina-3  | CCCGACTGGACCACTGACA       | CAGCATGCGAGGCATGACT       |
| α-SMA        | GTCCCAGACATCAGGGAGTAA     | TCGGATACTTCAGCGTCAGGA     |
|              |                           |                           |

α-SMA: actina alfa de músculo liso; ANP: péptido natriurético atrial; ARNm: ácido ribonucleico mensajero; β-MHC: cadena pesada de la miosina isoforma beta; BNP: péptido natriurético cerebral; GAPDH: gliceraldehído-3-fosfato deshidrogenasa; RT-PCR: reacción en cadena de la polimerasa a tiempo real; TBX1: proteína T-box 1; TGFb: factor de crecimiento transformador beta.

Tabla S2

Análisis de correlación entre los niveles de expresión de ARNm de TBX1 y la expresión de genes fetales en el miocardio no infartado.

|      | ANP                               | BNP                               | β-MHC                            | α-actina-1                        |
|------|-----------------------------------|-----------------------------------|----------------------------------|-----------------------------------|
| TBX1 | r = -0,019<br>p = 0,914<br>n = 43 | r = -0,159<br>p = 0,340<br>n = 43 | r = 0,179<br>p = 0,288<br>n = 43 | r = -0,047<br>p = 0,777<br>n = 41 |

ANP: péptido natriurético atrial; ARNm: ácido ribonucleico mensajero; β-MHC: cadena pesada de la miosina isoforma beta; BNP: péptido natriurético cerebral; TBX1: proteína T-box 1.



**Tabla S3**

Análisis de correlación entre los niveles de expresión de ARNm de los marcadores de fibrosis en el miocardio infartado.

|                     | <b>colágeno III</b>              | <b>TGFb</b>                      | <b>galectina-3</b>               | <b>α-SMA</b>                     |
|---------------------|----------------------------------|----------------------------------|----------------------------------|----------------------------------|
| <b>colágeno I</b>   | r = 0,741<br>p < 0,001<br>n = 41 | r = 0,687<br>p < 0,001<br>n = 45 | r = 0,535<br>p < 0,001<br>n = 45 | r = 0,764<br>p < 0,001<br>n = 43 |
| <b>colágeno III</b> |                                  | r = 0,618<br>p < 0,001<br>n = 41 | r = 0,524<br>p = 0,001<br>n = 41 | r = 0,337<br>p = 0,047<br>n = 41 |
| <b>TGFb</b>         |                                  |                                  | r = 0,480<br>p = 0,001<br>n = 45 | r = 0,709<br>p < 0,001<br>n = 43 |
| <b>galectina-3</b>  |                                  |                                  |                                  | r = 0,626<br>p < 0,001<br>n = 43 |

α-SMA: actina alfa de músculo liso; ARNm: ARNm: ácido ribonucleico mensajero; TGFb: factor de crecimiento transformador beta.
